1 **PREVALENCE OF ABNORMAL SEMINAL FLUID AND ASSOCIATED FACTORS**  
2 **AMONG PATIENTS ATTENDING FERTILITY CLINICS IN OSOGBO: A CROSS**  
3 **SECTIONAL STUDY**

4 <sup>a</sup>Kehinde Awodele, <sup>b</sup>Sunday Charles Adeyemo, <sup>c</sup>Eniola Dorcas Olabode, <sup>d</sup>Adeniyi  
5 Olaonipekun Fasanu, <sup>e</sup>Lanre Olaitan, <sup>d</sup>Akintunde Rasaq Akindele, <sup>f</sup>Olufunso Abidemi  
6 Olagunju, <sup>g</sup>Adeola Dorcas Aderinwale

7

8 <sup>a</sup>Obstetrics and Gynecology Department, Uniosun Teaching Hospital, Osogbo, Nigeria.

9 Kawodele@uth-osogbo.org.ng

10 <sup>b</sup>Institut Supérieur de Sante, Niamey, Niger Republic

11 charlespatho@gmail.com

12 <sup>c</sup>Department of Community Health, Obafemi Awolowo University, Ile-Ife, Nigeria

13 oluwafemieniola.ed@gmail.com

14 <sup>d</sup>Department of Obstetrics and Gynecology, Osun State University, Osogbo, Nigeria.

15 [adeniyi.fasanu@uniosun.edu.ng](mailto:adeniyi.fasanu@uniosun.edu.ng)

16 [drakindele@yahoo.com](mailto:drakindele@yahoo.com)

17 <sup>e</sup>Department of public health/fb. University of Ilorin.

18 [Lanreolive@gmail.com](mailto:Lanreolive@gmail.com)

19 <sup>f</sup>Department of Pediatrics, Osun State University, Osogbo, Osun State, Nigeria

20 funso.olagunju@uniosun.edu.ng

21 <sup>g</sup>Primary Health Care Unit, Adeleke University, Ede, Nigeria

22 aderinwaleadeola@gmail.com

23 **Corresponding author:**

24 Kehinde Awodele

25 +2348033992462, Kawodele@uth-osogbo.org.ng

26

27

28

29 **ABSTRACT**

30 **Background:** Infertility is a global health issue that affects millions of couples worldwide, In  
31 Nigeria, the prevalence of infertility is particularly high underscoring the need for a better  
32 understanding of the factors contributing to male infertility at which Seminal Fluid Analysis  
33 (SFA) is the most important characteristics. This study aimed to assess the prevalence of  
34 abnormal seminal fluid and its associated factors among patients attending fertility clinics in  
35 Osogbo, Nigeria.

36 **Methods and Findings:** A descriptive cross-sectional study design was used among male  
37 patients attending fertility centers in Osogbo, Osun State. Fisher's formula ( $n=z^2pq/d^2$ ) was  
38 used to determine the sample size. 305 respondents were selected using multistage  
39 sampling technique. Pre-tested questionnaire was used to collect data from respondents.  
40 Patients who consented to the study were also made to undergo seminal fluid analysis. The  
41 results were analysed using IBM Statistical Product for Service Solution (SPSS) version  
42 27. Descriptive statistics was used for all variables. Bivariate and multivariate analysis  
43 were done at  $p<0.05$  as level of significance. Majority of the respondents, 257 (84.3%) had  
44 at least one abnormality of Seminal fluid. Multiple regression analysis revealed that  
45 respondents who were habitual drunkard were about five times more likely to have at least  
46 one abnormality in their seminal fluid (OR: 4.990,  $p: 0.004$ , C.I.: 1.688-14.749) and  
47 smokers were three times more likely to have at least one abnormality in their seminal fluid  
48 ( $p=0.005$ , OR=3.300 and C.I.=1.396-4.273). Also, respondents with history of sexually  
49 transmitted infection were 3.5 times more likely to have at least one abnormality in their  
50 seminal fluid ( $p=0.039$ , OR=3.595 and C.I.=1.072-14.146).

51 **Conclusions:** The study observed high prevalence of abnormal seminal fluid which was  
52 significantly associated with lifestyle habits such as smoking, alcohol as well as previous  
53 history of sexually transmitted infection. The study recommended that advocacy program for

54 healthy lifestyle, early screening and public health education will further reduce the burden of  
55 abnormal seminal fluid and by implication, infertility among couples.

56 **Keywords:** Male Infertility, Implications, Seminal fluid Analysis, Sperm count.

57

58

## 59 **INTRODUCTION**

60 Infertility is a global health issue that affects millions of couples worldwide. The inability to  
61 conceive a child after a year of regular, unprotected intercourse is a distressing experience for  
62 many couples, leading to emotional, psychological, and social challenges. [1] In Nigeria, the  
63 prevalence of infertility is particularly high, with studies showing that around 20-30% of  
64 couples face fertility challenges. [2]

65 One of the most important aspects of male infertility is the quality and characteristics of the  
66 seminal fluid. Seminal fluid, also known as semen, is a complex mixture of spermatozoa and  
67 secretions from the male reproductive glands, including the seminal vesicles, prostate, and  
68 bulbourethral glands. Seminal fluid plays a crucial role in the fertilisation process, providing  
69 a supportive environment for sperm transport, nourishment, and protection against the female  
70 reproductive tract's hostile conditions. [3]

71 Infertility is a significant public health concern affecting millions of couples worldwide, with  
72 male infertility accounting for approximately half of these cases.[4] In Southwest Nigeria,  
73 particularly, there is a noticeable gap in research regarding the seminal fluid analysis (SFA)  
74 and its implications on male infertility among patients attending fertility clinics [5] Therefore,  
75 this study aims to assess the prevalence of abnormal seminal fluid among male patients  
76 attending fertility centers in Osogbo, Osun State, Nigeria.

## 77 **METHODS**

78 A descriptive cross-sectional study design was used in the study. The study population  
79 were male patients attending fertility centers in Osogbo, Osun State. Fisher's formula

80  $(n=z^2pq/d^2)$  was used to determine the sample size. 305 respondents were selected using  
81 multistage sampling technique. Out of 10 major fertility centers in Osogbo, Osun State, 5  
82 centers were randomly selected. Proportional allocation was used to determine the number  
83 of respondents from each center. Male patients aged 18-50 were randomly selected in each  
84 center. Pre-tested questionnaire was used to collect data from respondents. Patients who  
85 consented to the study were also made to undergo seminal fluid analysis. The semen was  
86 collected aseptically after an abstinence period of 2–7 days using sterile universal bottles in  
87 a private room near the laboratory to limit the exposure of the semen to fluctuations in  
88 temperature and to control the time between collection and analysis. The semen was then  
89 analysed in the laboratory for sperm count, motility and morphology of the semen. The  
90 data from the questionnaire were analysed using IBM Statistical Product for Service  
91 Solution (SPSS) version 27. Descriptive statistics was used for all variables. Bivariate and  
92 multivariate analysis were done at  $p<0.05$  as level of significance.

## 93 **RESULTS**

### 94 **Sociodemographic characteristics of respondents**

95 All the respondents were married male attending the infertility clinic in Osogbo. More than  
96 half 164 (53.8%) of the respondents were with the ages of 31-40 years, while the majority,  
97 267(87.5%) were Yoruba. 164 (53.8%) had tertiary level of education followed by  
98 secondary 83 (27.2%). About half 140 (45.9%) were skilled workers while 110 (36.1%)  
99 were unskilled.

### 100 **Prevalence of abnormal seminal fluid**

101 Majority of the respondents, 84.3% had at least one abnormality while 15.7% have normal  
102 seminal fluid. About two-thirds 217 (71.1%) had normal sperm count ( $>32$  million per  
103 ejaculation) while 88 (28.9%) had abnormal sperm count. Only 97 (31.8%) had normal  
104 progressive motility ( $>32$  percent) while 208 (68.2%) had abnormal (Athenospermia)

105 progressive motility and 178 (58.4%) were found to have abnormal morphology  
106 (Teratospermia i.e., <4%). (Figure 1)

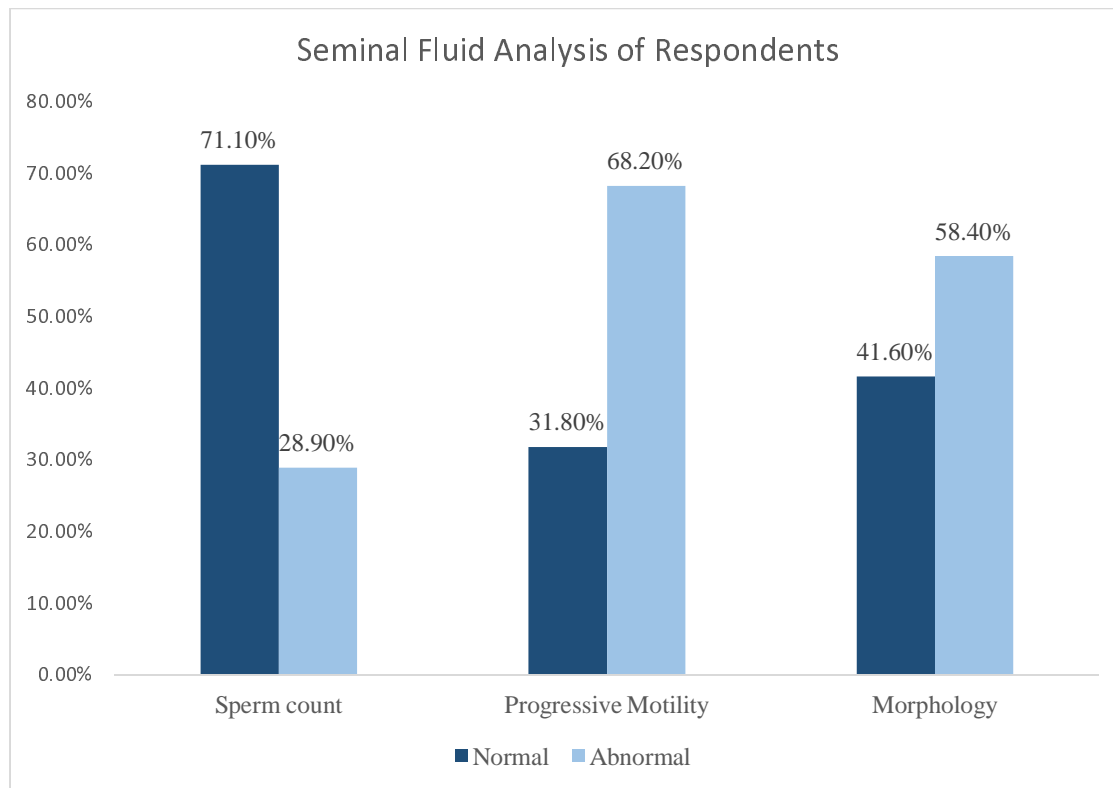

107

108 **Figure 1: Seminal fluid Analysis of Respondents**

109

110 **Lifestyle factors of respondents**

111 A little above one-third were known smokers (35.1), out of which 78.5% smokes cigarette  
112 and 21.5% smokes marijuana. Less than half (47.5%) were known drunkard while only  
113 8.5% currently used drugs. The majority (68.2%) eats any type of food available while  
114 23.6% regularly consumed carbohydrate/starch food and only 1.0% consumed vegetables.  
115 (Table 1)

116

117

118 **Table 1: Lifestyle behaviours among the respondents**

| <b>Variables</b>                       | <b>Frequency (n=305)</b> | <b>Percentage</b> |
|----------------------------------------|--------------------------|-------------------|
| <b>Known smoker</b>                    |                          |                   |
| Yes                                    | 107                      | 35.1              |
| No                                     | 198                      | 64.9              |
| <b>Type of smoke used (n=107)</b>      |                          |                   |
| Cigarette                              | 84                       | 78.5              |
| Marijuana                              | 23                       | 21.5              |
| <b>Known Drunkard</b>                  |                          |                   |
| Yes                                    | 145                      | 47.5              |
| No                                     | 160                      | 52.5              |
| <b>Currently using any drug</b>        |                          |                   |
| Yes                                    | 26                       | 8.5               |
| No                                     | 279                      | 91.5              |
| <b>Type of food consumed regularly</b> |                          |                   |
| Any food                               | 208                      | 68.2              |
| Carbohydrate/Starch                    | 72                       | 23.6              |
| Protein                                | 22                       | 7.2               |
| Vegetables                             | 3                        | 1.0               |

119

120

121 **Association between medical history of respondents and abnormal seminal fluid among**  
122 **respondents**

123 Majority of the respondents 65 (91.5%) who were diabetic had at least one abnormality in  
124 seminal fluid. Majority of the respondents 29 (96.7%) who were hypertensive had at least  
125 one abnormality in seminal fluid. Majority of the respondents 49 (90.7%) who were  
126 overweight had at least one abnormality in seminal fluid. However, there was no  
127 statistically significant association between these factors and abnormal seminal fluid.  
128 Majority of the respondents 84 (96.6%) who had history of sexually transmitted infection  
129 had at least one abnormality in seminal fluid and this was statistically significant  
130 ( $p < 0.001$ ). (Table 2)

131

132

133 **Table 2: Association between medical history of respondents and abnormal seminal**  
 134 **fluid among respondents**

| Variables                    | Seminal Fluid Analysis Category       |                      | Statistics                         |
|------------------------------|---------------------------------------|----------------------|------------------------------------|
|                              | At least One No Abnormality (n=257) % | Abnormality (n=48) % |                                    |
| <b>Diabetic</b>              |                                       |                      | $x^2 = 3.706$<br>$p = 0.054$       |
| Yes                          | 65 (91.5)                             | 6 (8.5)              |                                    |
| No                           | 192 (82.1)                            | 42 (17.9)            |                                    |
| <b>Hypertensive</b>          |                                       |                      | $x^2 = 2.893^*$<br>$p = 0.089$     |
| Yes                          | 29 (96.7)                             | 1 (3.3)              |                                    |
| No                           | 228 (82.9)                            | 47 (17.1)            |                                    |
| <b>History of Overweight</b> |                                       |                      | $x^2 = 2.077$<br>$p = 0.150$       |
| Yes                          | 49 (90.7)                             | 5 (9.3)              |                                    |
| No                           | 208 (82.9)                            | 43 (17.1)            |                                    |
| <b>History of STI</b>        |                                       |                      | $x^2 = 13.863$<br>$p < 0.001^{**}$ |
| Yes                          | 84 (96.6)                             | 3 (3.4)              |                                    |
| No                           | 173 (79.4)                            | 45 (20.6)            |                                    |

135  $\chi^2$  = chi-square, p = p-value, \* Continuity Correction, \*\* Statistically Significant

136

137 **Predictors of abnormal seminal fluid among respondents**

138 Multiple regression analysis revealed that respondents who were habitual drunkard were  
 139 about five times more likely to have at least one abnormality in their seminal fluid (OR:  
 140 4.990, p: 0.004, C.I.: 1.688-14.749) and smokers were three times more likely to have at  
 141 least one abnormality in their seminal fluid (p=0.005, OR=3.300 and C.I.=1.396-4.273).  
 142 Also, respondents with history of sexually transmitted infection were 3.5 times more likely

143 to have at least one abnormality in their seminal fluid ( $p=0.039$ ,  $OR=3.595$  and  $C.I=1.072-$   
144  $14.146$ ).

145

## 146 **Discussion**

147 This study assessed the prevalence of abnormal seminal fluid and its associated factors  
148 among patients attending fertility clinics in Osogbo, Osun State, Nigeria. More than half of  
149 the respondents were between the ages of 31 and 40 years old while more than two-fifth  
150 were aged 21-30 years. More than half of the respondents have tertiary as their highest  
151 educational attainment. This is similar to another study conducted among male partners  
152 attending infertility clinic in a tertiary Nigerian hospital [6]

153 More than four-fifth of the respondents had at least one abnormality. About one-third had  
154 abnormal sperm count, which is below the WHO 2010 reference for semen analysis. [7]

155 This proportion is also lower compared to the study of [8] where more than four-fifths were  
156 found to have abnormal sperm count. Almost 7 out of 10 respondents had abnormal  
157 (Athenospermia) progressive motility) which is more than the WHO 2010 reference of  
158  $<32\%$ . [7] Furthermore, this proportion is higher compared to another study carried out  
159 among male partners of infertile couples seeking care at the Lagos University Teaching  
160 Hospital where 55.8% had abnormal progressive motility. [9] Also, about three-fifth had  
161 abnormal morphology (Teratospermia i.e.,  $<4\%$ ). This proportion is much higher compared  
162 to 60.8% of abnormal morphology reported in the study of [6] among male patients in a  
163 tertiary Nigerian hospital.

164 The predictors of abnormal seminal fluid among respondents included smoking, drinking,  
165 and previous history of sexual transmitted infection such that respondents who were  
166 habitual drunkard were about five times more likely to have at least one abnormality in



167 their seminal fluid (OR: 4.990, p: 0.004, C.I.: 1.688-14.749) and smokers were three times  
168 more likely to had at least one abnormality in their seminal fluid (p=0.005, OR=3.300 and  
169 C.I.=1.396-4.273). Also, respondents with history of sexually transmitted infection were 3.5  
170 times more likely to have at least one abnormality in their seminal fluid (p=0.039,  
171 OR=3.595 and C.I.=1.072-14.146). This was also evident in the study of [6] where age,  
172 smoking and alcohol consumption were reported as the possible risk factors for abnormal  
173 sexually transmitted infection. This suggests that substance abuse, habitual smoker,  
174 drinking habit have detrimental impact on reproductive health and fertility as it has been  
175 associated with reduced sperm count, motility, and normal morphology. It is also linked to  
176 increased levels of sperm aneuploidy, lower seminal plasma antioxidant levels, and  
177 increased oxidative damage to sperm deoxyribonucleic acid (DNA). [10]

178 **Conclusions:** The findings indicate a prevalence of abnormal seminal fluid parameters (low  
179 sperm count, motility, and morphology) among the participants in which motility has the  
180 highest prevalence followed by morphology and sperm count respectively. Lifestyle factors  
181 such as smoking, alcohol consumption and sexually transmitted infections were found to be  
182 significantly associated with abnormal seminal fluid. The implications of abnormal seminal  
183 fluid parameters on infertile males are substantial, extending beyond physical health to  
184 encompass psychological, emotional, and social well-being. The findings from this study  
185 indicates the need for increased awareness about male infertility and accessibility to male  
186 fertility testing in order to combat the issue of infertility among couples. Further studies can  
187 assess the effect on seminal fluid analysis on male infertility.

### 188 **Acknowledgements**

189 The authors wish to acknowledge the respondents who gave their consent to be part of this  
190 study as well as the spouses of the authors for their understanding during the course of this  
191 study.

192 **REFERENCES**

- 193 [1] Zegers-Hochschild, F., Adamson, G. ., De Mouzon, J., Ishihara, O., Mansour, R., and  
194 Nygren, K. (2009). The International Committee for Monitoring Assisted Reproductive  
195 Technology (ICMART) and the World Health Organization (WHO) Revised Glossary on  
196 ART Terminology,. *Human Reproduction*, *24*, 2683–2687.
- 197 [2] Okonofua, F., Ntoimo, L., Ogungbangbe, J., Anjorin, S., Imongan, W., and Yaya, S.  
198 (2018). Predictors of women’s utilization of primary health care for skilled pregnancy care  
199 in rural Nigeria. *BMC Pregnancy and Childbirth*, *18*(1), 1–15.  
200 <https://doi.org/10.1186/s12884-018-1730-4>
- 201 [3] Robertson, S. A., and Sharkey, D. J. (2016). Seminal fluid and fertility in women.  
202 *Fertility and Sterility*, *106*(3), 511–519. <https://doi.org/10.1016/j.fertnstert.2016.07.1101>
- 203 [4] Agarwal, A., Mulgund, A., Hamada, A., & Chyatte, M. (2015). A unique view on male  
204 infertility around the globe. *Reproductive Biology and Endocrinology*, *13*(1), 37.
- 205 [5] Ibitoye, B. O., Fasasi, A. O., Imosemi, I. O., Alabi, O., Olaniyan, O. T., Ibitoye, F. O.,  
206 Faduola, P., Bodun, D. S., and Wike, N. Y. (2023). The spermiogram and correlation of  
207 seminal fluid parameters in patient attending fertility centre in Lagos, Southwest Nigeria.  
208 *Morphologie*, *107*(359), 100606. <https://doi.org/10.1016/j.morpho.2023.05.004>
- 209 [6] Umar, A. ., Panti, A. ., Mbakwe, M., Ahmed, Y., Garba, J. ., & Nnadi, D. C. (2020).  
210 The Pattern of Seminal Fluid Analysis among Male Partners Attending an Infertility  
211 Clinicin a Nigerian Tertiary Health Institution. *Open Journal of Obstetrics and*  
212 *Gynecology*, *10*, 957–967.
- 213 [7] WHO. (2021a). WHO laboratory manual for the examination and processing of human  
214 semen. In *WHO laboratory manual for the examination and processing of human semen*  
215 (5th ed.) (5th ed.).

216 [8] Tilahun, T., Oljira, R., and Getahun, A. (2022). Pattern of semen analysis in male  
217 partners of infertile couples in Western Ethiopia: Retrospective cross-sectional study.  
218 *SAGE Open Medicine*, 10, 1–7. <https://doi.org/10.1177/20503121221088100>

219 [9] Makwe, C. C., Ugwu, A. O., Ojewola, R. W., and Onyeze, C. I. (2021). Seminal fluid  
220 parameters of male partners of infertile couples seeking care at the Lagos University  
221 Teaching Hospital. *International Journal of Reproduction, Contraception, Obstetrics and*  
222 *Gynecology*, 10(4), 1347. <https://doi.org/10.18203/2320-1770.ijrcog20211109>

223 [10] Joo, K., Kwon, Y., Myung, S., & Kim, T. (2012). The Effects of Smoking and  
224 Alcohol Intake on Sperm Quality: Light and Transmission Electron Microscopy Findings.  
225 *Journal of International Medical Research*, 40(6), 2327–2335.  
226 <https://doi.org/10.1177/030006051204000631>

## 227 **Limitation**

228 The study is limited to patients attending fertility centers in Osogbo, which can have effect  
229 on the generalization of the study. Also, due to the nature of the study as a cross-sectional  
230 study, causal relationship may not be established.

## 231 **Ethical approval and consent to participate**

232 Ethical approvals for this study were obtained from the Ethics and Research Committee of  
233 Adeleke University, Ede, and Uniosun Teaching Hospital. The Protocol number  
234 UTH/EC/2024/06/957. All ethical principles guiding the conduct of research such as  
235 informed consent, beneficence, non- maleficence, confidentiality, justice, autonomy etc  
236 were strictly taken into consideration. All information gathered were confidential and  
237 privacy and confidentiality of the respondents were guaranteed. All respondents were made  
238 to sign the informed consent before filling the questionnaire.

239 **Consent for publication**

240 Not applicable

241 **Availability of data and material**

242 The data for this study is available on reasonable request from the corresponding author.

243 **Competing interest**

244 The authors know no competing interest for the study

245 **Funding**

246 The study was funded by the authors.

247 **Authors' contribution**

248 Kehinde Awodele-Research design, ethical compliance and data collection, Sunday Charles  
249 Adeyemo-Data Analysis and manuscripting, Eniola Dorcas Olabode- Data analysis and  
250 manuscripting, Adeniyi Olaonipekun Fasanu- Data collection and ethical compliance, Lanre  
251 Olaitan- Supervision and ethical compliance, Akintunde Rasaq Akindele- Data collection and  
252 ethical compliance, Olufunso Abidemi Olagunju- Data collection and Analysis, Adeola  
253 Dorcas Aderinwale-Data collection

254

255

256

257

258

259

260

261

262

263

264

265

266

267

268

## Seminal Fluid Analysis of Respondents

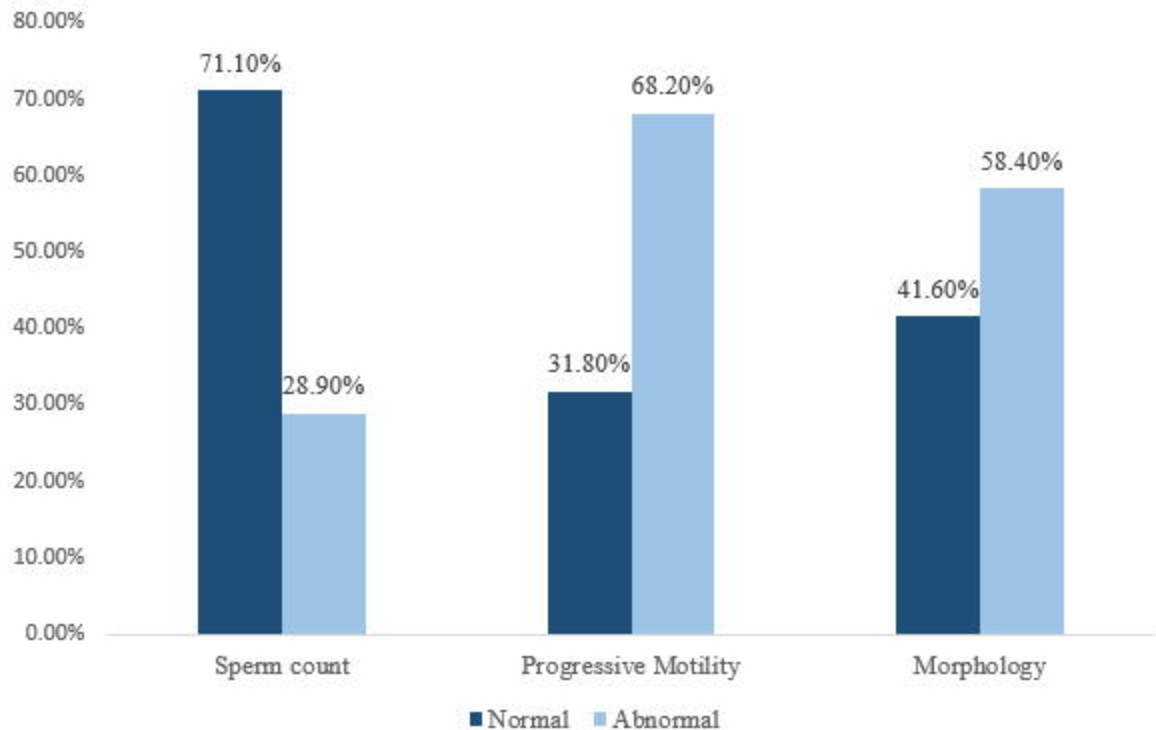

**Figure 1: Seminal fluid Analysis of Respondents**
